# Supplementary material
Source: HighWire-hosted journal article supplement (https://erj.ersjournals.com/content/55/5/1900980)
Supplement: inline-supplementary-material-1 [file inline-supplementary-material-1.pdf]

## ONLINE DATA SUPPLEMENT

Table E1. Cross correlation matrix of changes of the three different measurements (VAS, Dyspnoea-12 and Borg score) of breathlessness post-drainage (vs. baseline).

| Pearson correlation coefficient | $\Delta$ VAS | $\Delta$ D12 (total) | $\Delta$ D12 physical | $\Delta$ D12 affective | $\Delta$ BORG (pre-6MWT) | $\Delta$ BORG (post-6MWT) |
|---------------------------------|--------------|----------------------|-----------------------|------------------------|--------------------------|---------------------------|
| $\Delta$ VAS                    | 1.00         | -0.52                | -0.59                 | -0.35                  | -0.03                    | -0.01                     |
| $\Delta$ D12 (total)            | -0.52        | 1.00                 | -0.93                 | -0.89                  | -0.08                    | -0.03                     |
| $\Delta$ D12 physical           | -0.59        | -0.93                | 1.00                  | -0.66                  | -0.09                    | -0.03                     |
| $\Delta$ D12 affective          | -0.35        | -0.89                | -0.66                 | 1.00                   | -0.04                    | -0.02                     |
| $\Delta$ BORG (pre-6MWT)        | -0.03        | -0.08                | -0.09                 | -0.04                  | 1.00                     | -0.28                     |
| $\Delta$ BORG (post-6MWT)       | -0.01        | -0.03                | -0.03                 | -0.02                  | -0.28                    | 1.00                      |

$\Delta$  = post-drainage measurements minus pre-drainage measurements.

Pre-6MWT represented measurement before 6-minute walk test; Post-6MWT represented measurements after maximal exertion at 6-minute walk test.

Table E2: Variables considered for modelling the different subsets.

| Model Number | Subset description                         | Variables considered      |
|--------------|--------------------------------------------|---------------------------|
| 1            | Pre-VAS only                               | Pre-VAS                   |
| 2            | ALL VARIABLES                              | ALL VARIABLES             |
| 3            | Demographics only                          | Gender                    |
|              |                                            | Smoking                   |
|              |                                            | Age                       |
| 4            | Clinical variables only                    | Previous drainages        |
|              |                                            | Procedure type            |
|              |                                            | Diagnosis                 |
|              |                                            | Total volume drained (mL) |
|              |                                            | Days since detection      |
|              |                                            | Serum Albumin             |
|              |                                            | Serum Hb                  |
|              |                                            | pH                        |
| 5            | PROMs and demographics                     | ECOG                      |
|              |                                            | D12 Affective             |
|              |                                            | D12 Physical              |
|              |                                            | Dyspnoea12                |
|              |                                            | VAS                       |
|              |                                            | Age                       |
|              |                                            | Gender                    |
| 6            | PROMs (excluding pre-VAS) and demographics | Smoking                   |
|              |                                            | D12 Affective             |
|              |                                            | D12 Physical              |
|              |                                            | Dyspnoea 12               |
|              |                                            | Age                       |
|              |                                            | Gender                    |
| 7            | Radiology only                             | Smoking                   |
|              |                                            | Effusion grade            |
|              |                                            | Side of effusion          |
|              |                                            | Loculations               |
|              |                                            | Mediastinal shift         |
|              |                                            | Diaphragmatic appearance  |
| 8            | Physiology only                            | Diaphragm Movement        |
|              |                                            | FiO2                      |
|              |                                            | HR                        |
|              |                                            | RR                        |
|              |                                            | SpO2                      |
|              |                                            | 6MWT                      |
|              |                                            | FEV1 % predicted          |
|              |                                            | FVC % predicted           |

| Model Number | Subset description                                    | Variables considered      |
|--------------|-------------------------------------------------------|---------------------------|
| 9            | Physiology and radiology                              | Effusion grade            |
|              |                                                       | Side of effusion          |
|              |                                                       | Loculations               |
|              |                                                       | Mediastinal shift         |
|              |                                                       | Diaphragmatic appearance  |
|              |                                                       | Diaphragm Movement        |
|              |                                                       | FiO2                      |
|              |                                                       | HR                        |
|              |                                                       | RR                        |
|              |                                                       | SpO2                      |
|              |                                                       | 6MWT                      |
|              |                                                       | FEV1 % predicted          |
|              |                                                       | FVC % predicted           |
| 10           | Demographics and clinical                             | Gender                    |
|              |                                                       | Smoking                   |
|              |                                                       | Age                       |
|              |                                                       | Previous drainages        |
|              |                                                       | Procedure type            |
|              |                                                       | Diagnosis                 |
|              |                                                       | Total volume drained (mL) |
|              |                                                       | Days since detection      |
|              |                                                       | Serum Albumin             |
|              |                                                       | Serum Hb                  |
|              |                                                       | pH                        |
|              |                                                       | ECOG                      |
| 11           | Demographics, clinical and PROMs (excluding pre-VAS). | Gender                    |
|              |                                                       | Smoking                   |
|              |                                                       | Age                       |
|              |                                                       | Previous drainages        |
|              |                                                       | Procedure type            |
|              |                                                       | Diagnosis                 |
|              |                                                       | Total volume drained (mL) |
|              |                                                       | Days since detection      |
|              |                                                       | Serum Albumin             |
|              |                                                       | Serum Hb                  |
|              |                                                       | pH                        |
|              |                                                       | ECOG                      |
|              |                                                       | D12 Affective             |
|              |                                                       | D12 Physical              |
|              |                                                       | Dyspnoea 12               |
| 12           | Demographics, clinical and PROMs                      | Gender                    |
|              |                                                       | Smoking                   |

| Model Number | Subset description                                | Variables considered           |
|--------------|---------------------------------------------------|--------------------------------|
|              |                                                   | Age                            |
|              |                                                   | Previous drainages             |
|              |                                                   | Procedure type                 |
|              |                                                   | Diagnosis                      |
|              |                                                   | Total volume drained (mL)      |
|              |                                                   | Days since detection           |
|              |                                                   | Serum Albumin                  |
|              |                                                   | Serum Hb                       |
|              |                                                   | pH                             |
|              |                                                   | ECOG                           |
|              |                                                   | D12 Affective                  |
|              |                                                   | D12 Physical                   |
|              |                                                   | Dyspnoea12                     |
|              |                                                   | pre-VAS                        |
| 13           | Demographics, clinical, physiology and radiology. | Effusion grade                 |
|              |                                                   | Side of effusion               |
|              |                                                   | Loculations                    |
|              |                                                   | Mediastinal shift              |
|              |                                                   | Diaphragmatic appearance       |
|              |                                                   | Diaphragm Movement             |
|              |                                                   | ECOG                           |
|              |                                                   | FiO2                           |
|              |                                                   | HR                             |
|              |                                                   | RR                             |
|              |                                                   | SpO2                           |
|              |                                                   | 6MWT                           |
|              |                                                   | FEV1 % predicted               |
|              |                                                   | FVC % predicted                |
|              |                                                   | Gender                         |
|              |                                                   | Smoking                        |
|              |                                                   | Age                            |
| 14           | ALL VARIABLES (except pre-VAS)                    | ALL VARIABLES (except pre-VAS) |

PROM – Patient Reported Outcome Measure

Table E3. Comparisons of various subsets of baseline characteristics to determine which provide the best model for prediction of change in VAS. Models fitted using logistic regression and a change of 9 mm or more as a positive response.

There were 121 responders and 24 non-responders

| <b>Model Number</b> | <b>Subset description</b>                                              | <b>Variables selected by AIC (n=135)</b>                                                                                         | <b>AUC</b> | <b>Specificity</b> | <b>Sensitivity</b> | <b>PPV</b> | <b>NPV</b> |
|---------------------|------------------------------------------------------------------------|----------------------------------------------------------------------------------------------------------------------------------|------------|--------------------|--------------------|------------|------------|
| 1                   | Pre-VAS only                                                           | Pre-VAS                                                                                                                          | 0.77       | 0.81               | 0.60               | 0.94       | 0.27       |
| 2                   | All variables                                                          | Respiratory rate;<br>Dyspnea-12 (D-12);<br>Days since detection;<br>pH;<br>Diaphragm movement;<br>Previous Drainages;<br>Pre-VAS | 0.86       | 0.81               | 0.77               | 0.96       | 0.40       |
| 3                   | Demographics only                                                      | Age                                                                                                                              | 0.65       | 0.76               | 0.57               | 0.93       | 0.25       |
| 4                   | Clinical variables only                                                | Total volume drained (mL);<br>Days since detection;                                                                              | 0.70       | 0.62               | 0.79               | 0.92       | 0.35       |
| 5                   | Patient reported outcome measures and demographics                     | Pre-VAS;<br><br>Age                                                                                                              | 0.78       | 0.76               | 0.74               | 0.94       | 0.35       |
| 6                   | Patient reported outcome measures (excluding pre-VAS) and demographics | D-12 Physical;<br><br>Age                                                                                                        | 0.69       | 0.67               | 0.69               | 0.92       | 0.29       |
| 7                   | Radiology only                                                         | NONE<br>SELECTED                                                                                                                 | NA         | NA                 | NA                 | NA         | NA         |
| 8                   | Physiology only                                                        | FEV1 % predicted;<br>Heart rate                                                                                                  | 0.64       | 0.67               | 0.64               | 0.91       | 0.25       |

|    |                                                                                     |                                                                     |      |      |      |      |      |
|----|-------------------------------------------------------------------------------------|---------------------------------------------------------------------|------|------|------|------|------|
| 9  | Physiology and radiology                                                            | FEV1 % predicted;<br>Heart rate                                     | 0.64 | 0.67 | 0.64 | 0.91 | 0.25 |
| 10 | Demographics and clinical                                                           | Previous Drainages;<br>Age                                          | 0.70 | 0.67 | 0.70 | 0.92 | 0.29 |
| 11 | Demographic, clinical and patient reported outcome measures (excluding pre-VAS).    | Previous Drainages;<br>D-12 Physical;<br>Age                        | 0.72 | 0.62 | 0.82 | 0.92 | 0.38 |
| 12 | Demographic, clinical and patient reported outcome measures (pre-VAS, D12 and Borg) | D-12;<br>Serum Hb;<br>pH;<br>Age;<br>Previous Drainages;<br>Pre-VAS | 0.83 | 0.67 | 0.92 | 0.94 | 0.61 |
| 13 | Demographics , clinical, physiology and radiology.                                  | FEV1 % predicted;<br>Age;<br>Heart rate                             | 0.67 | 0.67 | 0.62 | 0.91 | 0.25 |
| 14 | All variables (except pre-VAS)                                                      | FEV1 % predicted;<br>Age;<br>Previous Drainages                     | 0.71 | 0.71 | 0.66 | 0.93 | 0.28 |

Table E4. Comparisons of various subsets of baseline characteristics to determine which provide the best model for prediction of change in VAS. Models fitted using logistic regression and a change of 19 mm or more as a positive response.  
There were 102 responders and 43 non-responders

| <b>Model Number</b> | <b>Subset description</b>                                              | <b>Variables selected by AIC (n=135)</b>                              | <b>AUC</b> | <b>Specificity</b> | <b>Sensitivity</b> | <b>PPV</b> | <b>NPV</b> |
|---------------------|------------------------------------------------------------------------|-----------------------------------------------------------------------|------------|--------------------|--------------------|------------|------------|
| 1                   | Pre-VAS only                                                           | Pre-VAS                                                               | 0.81       | 0.62               | 0.89               | 0.85       | 0.71       |
| 2                   | All variables                                                          | Diagnosis;<br>Serum Albumin;<br>Diaphragm Movement;<br>pH;<br>Pre-VAS | 0.85       | 0.75               | 0.80               | 0.88       | 0.61       |
| 3                   | Demographics only                                                      | NONE SELECTED                                                         | NA         | NA                 | NA                 | NA         | NA         |
| 4                   | Clinical variables only                                                | Total volume drained (mL);<br>Days since detection;<br>ECOG           | 0.68       | 0.68               | 0.62               | 0.82       | 0.43       |
| 5                   | Patient reported outcome measures and demographics                     | Pre-VAS                                                               | 0.81       | 0.62               | 0.89               | 0.85       | 0.71       |
| 6                   | Patient reported outcome measures (excluding pre-VAS) and demographics | D-12 Physical                                                         | 0.70       | 0.68               | 0.60               | 0.81       | 0.42       |
| 7                   | Radiology only                                                         | Loculations;<br>Side of effusion;<br>Effusion grade                   | 0.65       | 0.57               | 0.68               | 0.79       | 0.43       |
| 8                   | Physiology only                                                        | FEV1 % predicted;<br>Respiratory rate                                 | 0.64       | 0.62               | 0.60               | 0.79       | 0.40       |
| 9                   | Physiology and radiology                                               | FEV1 % predicted;<br>Respiratory rate                                 | 0.64       | 0.62               | 0.60               | 0.79       | 0.40       |
| 10                  | Demographics and clinical                                              | Total volume drained (mL);                                            | 0.68       | 0.68               | 0.62               | 0.82       | 0.43       |

|    |                                                                                                     |                                                                                     |      |      |      |      |      |
|----|-----------------------------------------------------------------------------------------------------|-------------------------------------------------------------------------------------|------|------|------|------|------|
|    |                                                                                                     | Days since<br>detection;<br>ECOG                                                    |      |      |      |      |      |
| 11 | Demographic,<br>clinical and patient<br>reported outcome<br>measures<br>(excluding pre-<br>VAS).    | Total volume<br>drained (mL);<br><br>ECOG;<br>pH;<br>D12 Physical                   | 0.75 | 0.62 | 0.78 | 0.83 | 0.54 |
| 12 | Demographic,<br>clinical and patient<br>reported outcome<br>measures (pre-<br>VAS, D12 and<br>Borg) | Total volume<br>drained (mL);<br><br>pH;<br>Pre-VAS                                 | 0.83 | 0.68 | 0.86 | 0.86 | 0.68 |
| 13 | Demographics,<br>clinical,<br>physiology and<br>radiology.                                          | FEV1 %<br>predicted;<br><br>Respiratory rate                                        | 0.64 | 0.62 | 0.60 | 0.79 | 0.40 |
| 14 | All variables<br>(except pre-VAS)                                                                   | SpO2;<br><br>Serum Albumin;<br>Total volume<br>drained (mL);<br>pH;<br>D12 Physical | 0.76 | 0.70 | 0.78 | 0.86 | 0.57 |



Table E5: Comparisons of various subsets of baseline characteristics to determine which provide the best model for prediction of change in VAS. Models fitted using logistic regression and VAS a continuous scale.

| Model Number | Subset description                                                     | Variables selected by AIC (n=135)                                                                                            | R-squared | Adjusted R-squared | RMSE  |
|--------------|------------------------------------------------------------------------|------------------------------------------------------------------------------------------------------------------------------|-----------|--------------------|-------|
| 1            | Pre-VAS only                                                           | Pre-VAS                                                                                                                      | 0.50      | 0.49               | 17.07 |
| 2            | All variables                                                          | Move<br>D12 Affective<br>D12 Physical<br>Dyspnoea12<br>Distance<br>Days since detection<br>Respiratory rate<br>pH<br>Pre-VAS | 0.57      | 0.53               | 15.86 |
| 3            | Demographics only                                                      | Age                                                                                                                          | 0.02      | 0.01               | 23.86 |
| 4            | Clinical variables only                                                | Serum Hb<br>Procedure type                                                                                                   | 0.05      | 0.02               | 23.52 |
| 5            | Patient reported outcome measures and demographics                     | Pre-VAS                                                                                                                      | 0.50      | 0.49               | 17.07 |
| 6            | Patient reported outcome measures (excluding pre-VAS) and demographics | Age<br>D12 Physical                                                                                                          | 0.19      | 0.17               | 21.71 |

|    |                                                                                      |                                           |      |      |       |
|----|--------------------------------------------------------------------------------------|-------------------------------------------|------|------|-------|
| 7  | Radiology only                                                                       | Loculations                               | 0.02 | 0.01 | 23.87 |
| 8  | Physiology only                                                                      | FVC % predicted                           | 0.04 | 0.03 | 23.64 |
| 9  | Physiology and radiology                                                             | FVC % predicted<br>Loculations            | 0.05 | 0.04 | 23.46 |
| 10 | Demographics and clinical                                                            | Age<br>Procedure type                     | 0.05 | 0.03 | 23.5  |
| 11 | Demographics, clinical and patient reported outcome measures (excluding pre-VAS).    | Age<br>Previous drainages<br>D12 Physical | 0.21 | 0.19 | 21.43 |
| 12 | Demographics, clinical and patient reported outcome measures (pre-VAS, D12 and Borg) | Days since detection<br>pH<br>Pre-VAS     | 0.53 | 0.52 | 16.57 |
| 13 | Demographics, clinical, physiology and radiology.                                    | FVC % predicted<br>Loculations            | 0.05 | 0.04 | 23.46 |
| 14 | All variables (except pre-VAS)                                                       | Age<br>Previous drainages<br>D12 Physical | 0.21 | 0.19 | 21.43 |

Table E6: Volume drained, pre-drainage diaphragm appearance and movement, spirometry, 6-minute walk distance, and VAS score pre- and post-drainage for each Light's grade of effusion (pre-drainage) in participants with unilateral pleural effusion

| Pre-Effusion Grade | Volume drained, ml | Pre-Diaphragm shape, n (%) |           |          | Pre-Diaphragm movement, n (%) |                       | Pre-VAS, mm | Post-VAS, mm | Pre-FEV <sub>1</sub> pred, % | Post-FEV <sub>1</sub> pred, % | Pre-FVC pred, % | Post-FVC pred, % | Pre-6MWD, m  | Post-6MWD, m |
|--------------------|--------------------|----------------------------|-----------|----------|-------------------------------|-----------------------|-------------|--------------|------------------------------|-------------------------------|-----------------|------------------|--------------|--------------|
|                    |                    | Domed                      | Flattened | Inverted | Normal <sup>#</sup>           | Abnormal <sup>*</sup> |             |              |                              |                               |                 |                  |              |              |
| Grade 2<br>n=10    | 1308<br>(499)      | 7 (70)                     | 1 (10)    | 2 (20)   | 8 (80)                        | 2 (20)                | 40<br>(24)  | 75<br>(25)   | 44<br>(18)                   | 50<br>(19)                    | 58<br>(26)      | 67<br>(22)       | 262<br>(141) | 296<br>(154) |
| Grade 3<br>n=44    | 1488<br>(735)      | 32 (73)                    | 10 (23)   | 2 (4)    | 33 (75)                       | 11 (25)               | 48<br>(25)  | 71<br>(18)   | 54<br>(17)                   | 59<br>(16)                    | 55<br>(17)      | 58<br>(15)       | 289<br>(143) | 311<br>(150) |
| Grade 4<br>n=38    | 2180<br>(1083)     | 15 (40)                    | 18 (47)   | 5 (13)   | 15 (39)                       | 23 (61)               | 47<br>(18)  | 75<br>(16)   | 42<br>(12)                   | 53<br>(17)                    | 43<br>(14)      | 54<br>(17)       | 242<br>(130) | 279<br>(144) |
| Grade 5<br>n=30    | 3132<br>(1740)     | 2 (7)                      | 15 (50)   | 13 (43)  | 1 (3)                         | 29 (97)               | 40<br>(19)  | 70<br>(18)   | 35<br>(8)                    | 46<br>(11)                    | 35<br>(9)       | 45<br>(12)       | 196<br>(169) | 244<br>(190) |

All data were presented as mean (SD) and count (%); Pre = Pre-drainage; Post = Post drainage

<sup>#</sup> Normal diaphragm movement also included participants with reduced diaphragm movement

<sup>\*</sup> Abnormal diaphragm movement consists of participants with no movement and paradoxical movement

We did not perform a similar analysis in patients with bilateral effusion as there were only 23 patients and majority (16/23) had a Grade 3 pleural effusion.

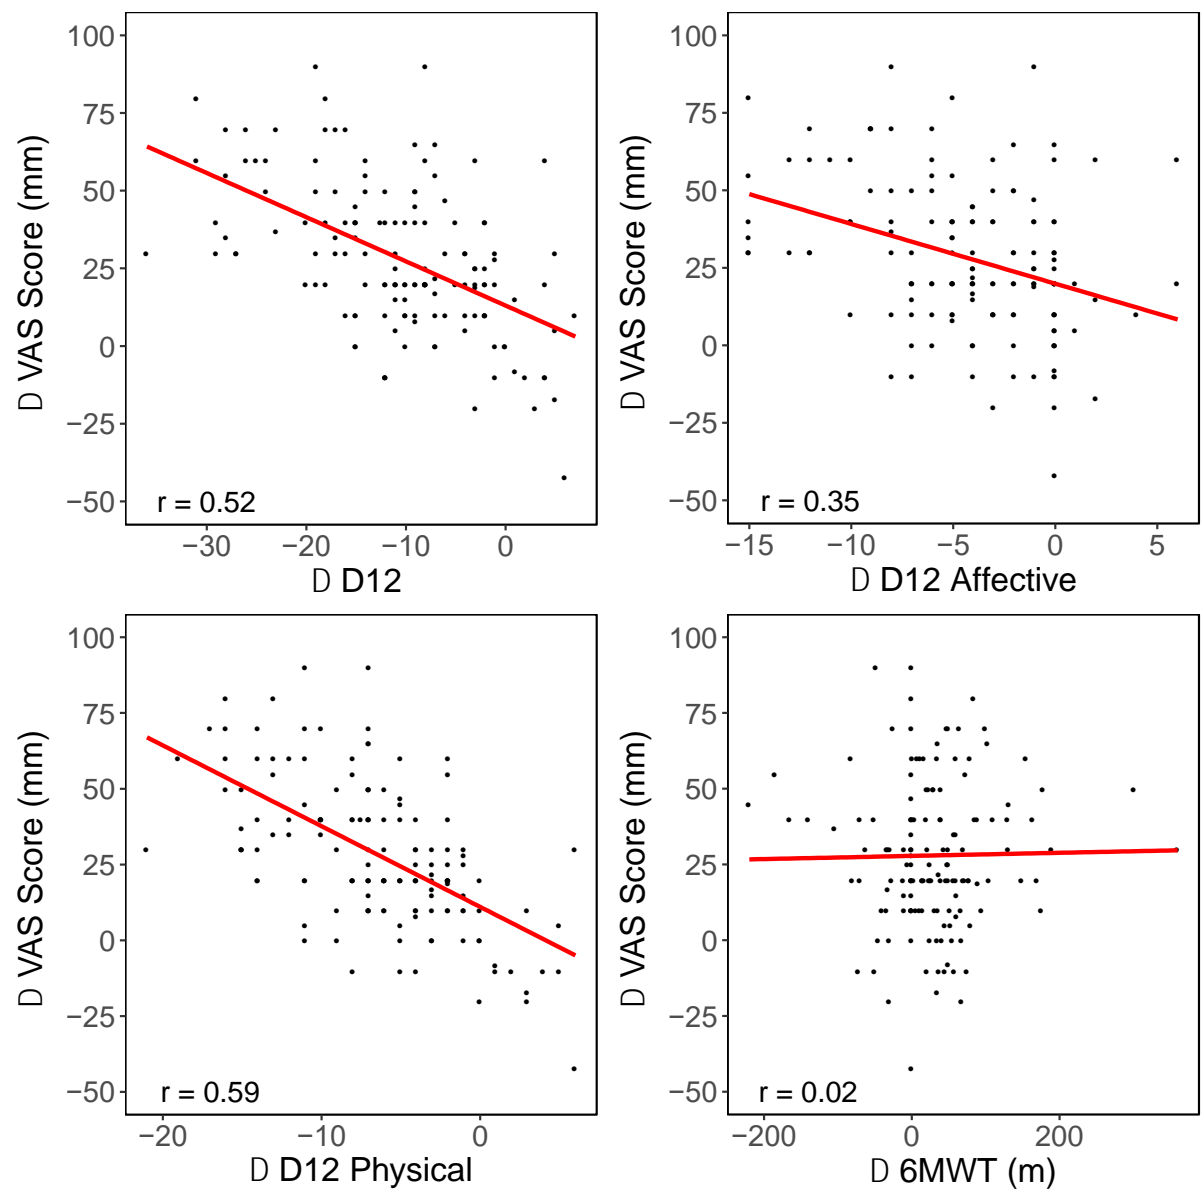

Figure E1: Relationship between change in VAS score and change in D12 score (top left panel), change D12 affective (top right panel), change in D12 physical (bottom left panel) change in 6-minute walk test (bottom right panel).

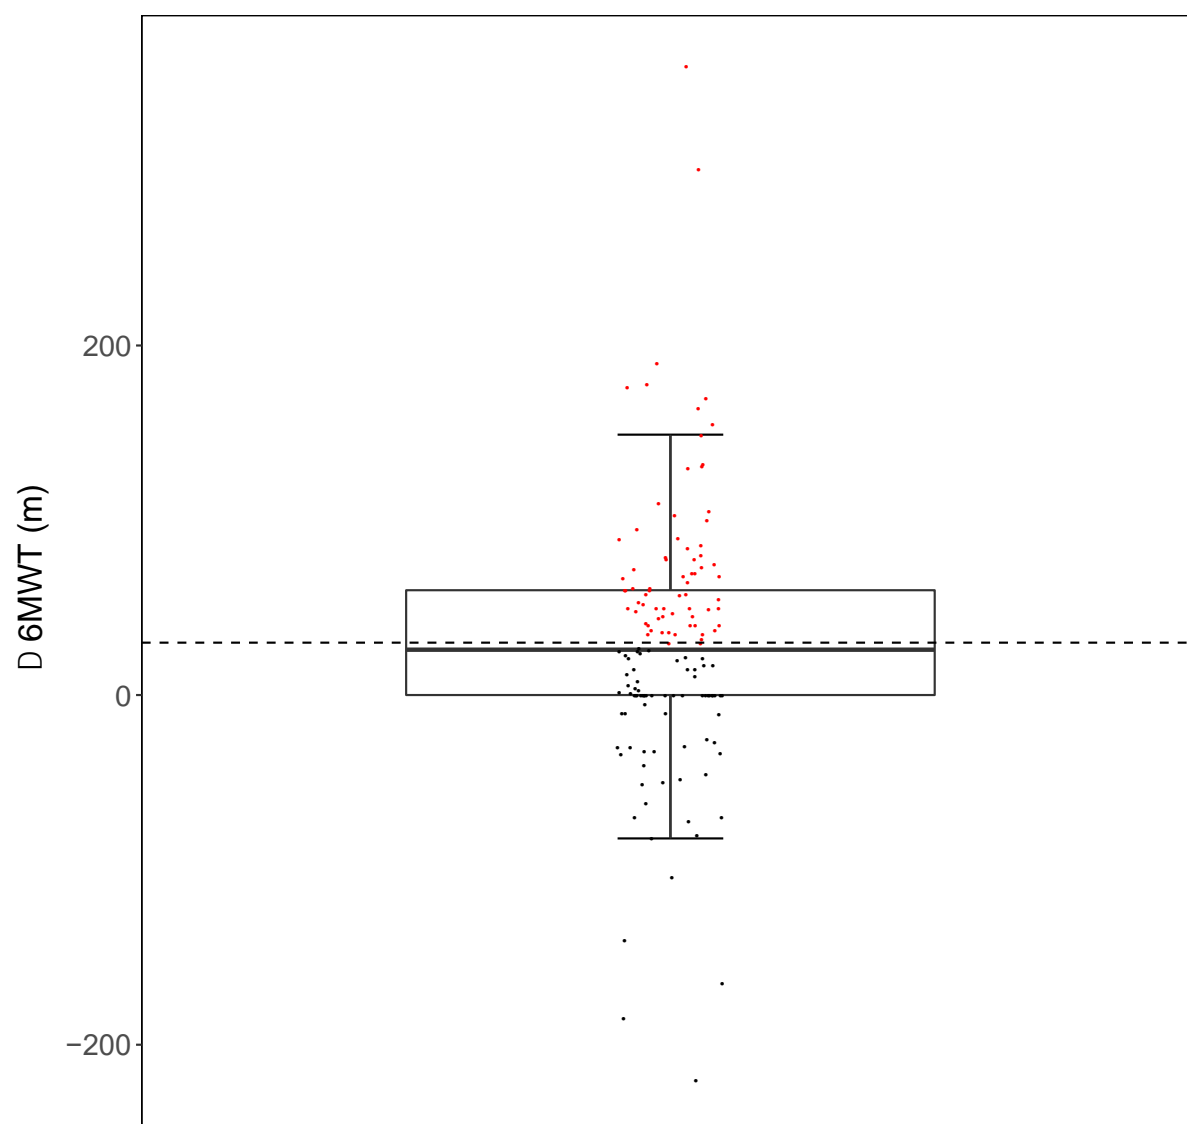

Figure E2: Change in 6-minute walk test distance from pre to post drainage. Red dots indicate those individuals who have an increase of at least 30 m.

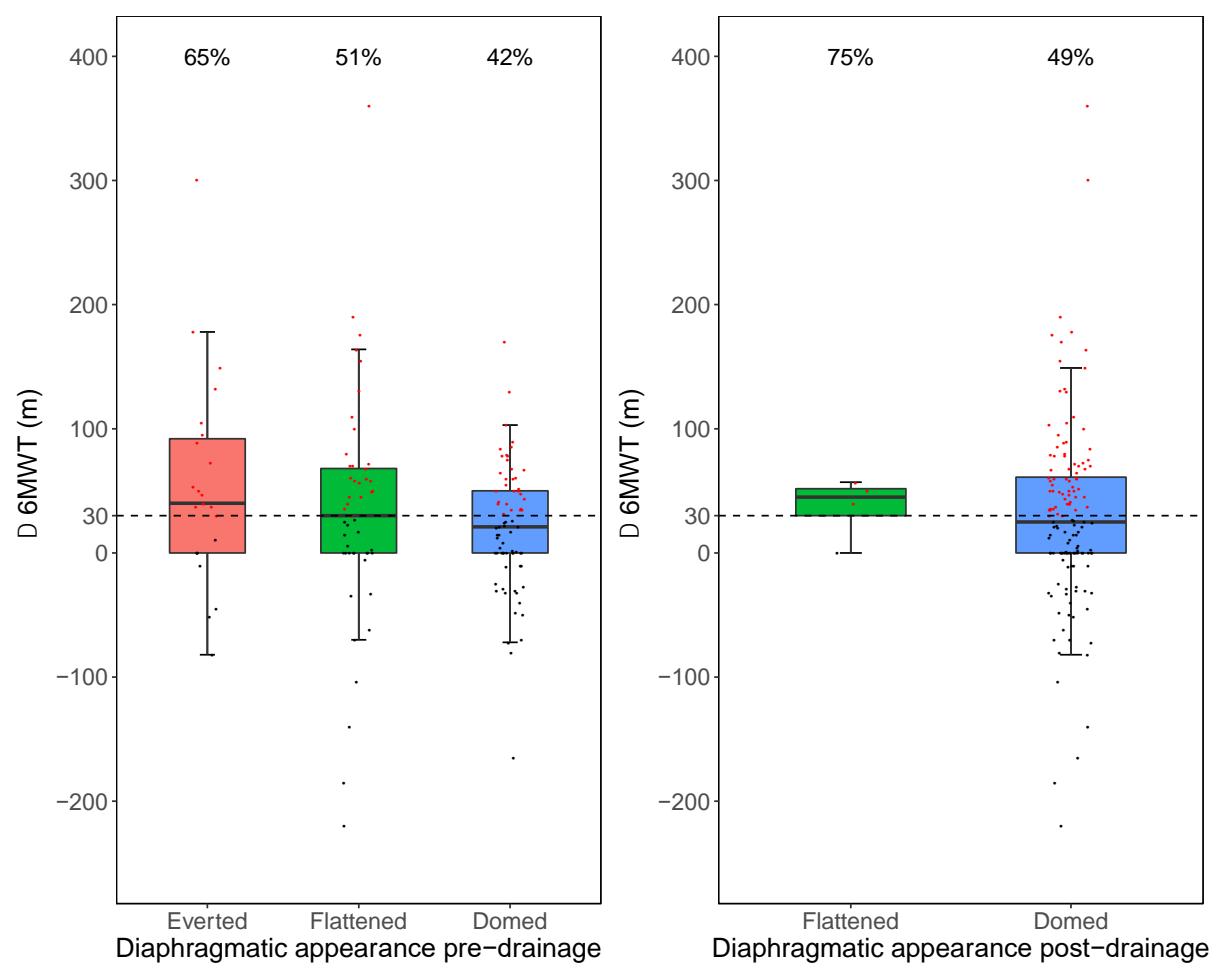

Figure E3: Change in 6-minute walk test by diaphragmatic appearance pre-drainage (left panel) and post drainage (right panel). Percentages at the top describe the proportion of participants who had a change in 6-minute walk distance of 30 m or more post-drainage.
